# Supplementary material for: Immunoglobulin D enhances immune surveillance by activating antimicrobial, proinflammatory and B cell–stimulating programs in basophils
Source: Springer Nature journal article supplement (doi:10.1038/ni.1748), 2009-06-28

## **Immunoglobulin D enhances immune surveillance by activating antimicrobial, pro-inflammatory and B cell-stimulating programs in basophils**

**Kang Chen, Weifeng Xu, Melanie Wilson, Bing He, Norman W. Miller, Eva Bengten, Eva-Stina Edholm, Paul A. Santini, Poonam Rath, April Chiu, Marco Cattalini, Jiri Litzman, James Bussel, Bihui Huang, Antonella Meini, Kristian Riesbeck, Charlotte Cunningham-Rundles, Alessandro Plebani, Andrea Cerutti**

**SUPPLEMENTARY FIGURE LEGENDS S1 – S11**

**SUPPLEMENTARY TABLES S1 – S2**

**SUPPLEMENTARY FIGURES S1– S11**

**SUPPLEMENTARY FIGURE LEGENDS**

**Figure S1.** Detection of IgD<sup>+</sup>IgM<sup>-</sup> plasmablasts in follicular and extrafollicular areas of the upper respiratory mucosa and peripheral blood. **(a, b)** Immunofluorescence analysis of tonsil tissue stained for IgD (green) and IgM (red). DAPI (blue) counterstains nuclei. Dashed and dotted lines demarcate follicular and subepithelial areas, respectively. Arrowheads point to follicular and extrafollicular IgD<sup>+</sup>IgM<sup>-</sup> plasmablasts. In **b**, box shown in upper panel includes a mucosal area that was further magnified in bottom panels. Note that many of the IgD<sup>-</sup>IgM<sup>+</sup> cells visualized in the germinal center correspond to follicular dendritic cells capturing IgM-containing immunocomplexes. Original magnification, ×10. **(c)** Tonsil tissue stained for IgD (green), CD19 (red) and IgM (blue). DAPI (blue) counterstains nuclei. Arrowheads in bottom panels point to magnified IgD<sup>+</sup>IgM<sup>-</sup>CD19<sup>+</sup> plasmablasts from boxed area in upper panel. Original magnification, ×10 (upper panels) and ×40 (bottom panels). **(d)** Flow cytometric analysis of CD5, CD10, CD19, CD20, CD21, CD22, CD23, CD24, CD27, CD38, CD39, CD40, CD77, CD138, BAFF-R, TACI, BCMA, Pax5, Blimp-1, κ, λ, Ki-67, MHC-I and MHC-II on IgD<sup>+</sup>IgM<sup>+</sup> (gate G1, blue histograms) and IgD<sup>+</sup>IgM<sup>-</sup> (gate G2, red histograms) B cells from tonsils. These B cells were also stained with hematoxylin and eosin after FACS sorting. Original magnification, ×40. **(e)** CD5, CD10, CD21, CD23, CD27 and CD38 on IgD<sup>+</sup>IgM<sup>+</sup> (blue histograms) and IgD<sup>+</sup>IgM<sup>-</sup> (red histogram) B cells from peripheral blood. Panels a-e show 1 of 5 experiments yielding similar results.

**Figure S2.** Class switching from IgM to IgD occurs in response to CD40L, BAFF or APRIL combined with IL-2 plus IL-21. **(a)** Flow cytometric analysis of CD19, IgM and IgD on peripheral blood IgD<sup>+</sup>IgM<sup>+</sup> B cells used for class switch experiments. Gray histogram shows an isotype-matched control. **(b)** IgD and IgM expression on peripheral blood IgD<sup>+</sup>IgM<sup>+</sup> B cells exposed to CD40L, BAFF or APRIL and a combination of IL-2 plus IL-21 for 7 days. **(c)** ELISA of IgD secreted by peripheral blood IgD<sup>+</sup>IgM<sup>+</sup> B

cells stimulated as in b. **(d)** IgD and IgM expression on peripheral blood IgD<sup>+</sup>IgM<sup>+</sup> B cells exposed to individual or combined cytokines (IL-2, IL-4, IL-10, IL-13, IL-15 or IL-21) in the presence or absence of CD40L, BAFF or APRIL for 7 days. Panels a, b and c show 1 of 3 experiments yielding similar results, whereas panel c summarizes 3 experiments (bars indicate s.e.m.).

**Figure S3.** Class switching from IgM to IgD is absolutely dependent on AID, but only partially dependent on CD40. **(a)** Percentage of circulating IgD<sup>+</sup>IgM<sup>-</sup> plasmablasts in patients with *TNFSF5* (HIGM1, 3 cases) or *AICDA* (HIGM2, 3 cases) gene defects. **(b)** Immunofluorescence analysis of extrafollicular plasmablasts from the mucosa of a healthy individual or patients with *TNFRSF5* (HIGM3) or *AICDA* (HIGM2) gene defects stained for IgD (green) and IgM (red). DAPI (blue) counterstains nuclei. Note double-positive IgD<sup>+</sup>IgM<sup>+</sup> plasmablasts in both HIGM2 and HIGM3 tissue sections as well as residual class-switched IgD<sup>+</sup>IgM<sup>-</sup> plasmablasts in the HIGM3 tissue section. Original magnification, ×40. **(c)** Tonsil tissue from a HIGM2 patient stained for IgD (green) and IgM (red). DAPI (blue) counterstains nuclei. Dashed lines demarcate primary follicles. Follicular double-positive IgD<sup>+</sup>IgM<sup>+</sup> plasmablasts from upper panel are shown magnified in bottom panels. Original magnification, ×10 (upper panels) and ×40 (bottom panels). **(d)** Flow cytometric analysis of IgM and IgD on gated CD19<sup>+</sup> B cells from a healthy subject and two HIGM2 patients incubated with medium alone (control) or BAFF plus IL-2 plus IL-21 for 5 days. Due to the limited amount of HIGM2 blood specimens, the experiment was performed with peripheral blood mononuclear cells and involved surface Ig triggering by an anti-IgM antibody to obtain maximal activation and expansion of the B cells present in the culture. Panels a-d show 1 of 3 experiments yielding similar results.

**Figure S4.** Polyclonal and monoclonal anti-IgD antibodies specifically detect IgD on the surface of basophils. **(a)** Percentage of IgD-armed basophils in three healthy donors as determined by stainings performed with either a goat F(ab')<sub>2</sub> pAb to IgD or a mouse IA6-2 mAb to IgD. Neutrophils, eosinophils

and B cells are shown for comparison. **(b)** Comparable IgD profiles on basophils, neutrophils, eosinophils and B cells stained with either a goat F(ab')<sub>2</sub> pAb to IgD or a mouse IA6-2 mAb to IgD. Panels a-d show 1 of 3 experiments yielding similar results.

**Figure S5.** IgD binds to both basophils and mast cells *in vivo*. **(a)** Flow cytometric analysis of IgD on viable (7-AAD<sup>-</sup>) basophils, neutrophils, eosinophils, monocytes and myeloid dendritic cells (mDCs) from the peripheral blood of healthy individuals. A F(ab')<sub>2</sub> pAb was used to detect IgD. Mean fluorescence intensity (MFI) was the ratio between the fluorescence intensity of IgD-stained cells and the fluorescence intensity of unstained cells. The dashed line indicates average MFI for IgD on basophils. **(b)** Flow cytometric analysis of IgD, IgE, CD117 and FcεRI on viable (7-AAD<sup>-</sup>) lung mast cells. A F(ab')<sub>2</sub> pAb was used to detect IgD. Controls (gray histograms) include cells stained with appropriate isotype-matched antibodies with irrelevant binding activity (CD117 and FcεRI) or unstained cells (IgE or IgD). **(c)** IgD, CD117 and FcεRI on viable circulating mast cells from two patients with mastocytoma. IgD was detected with a F(ab')<sub>2</sub> pAb and then analyzed on gated CD117<sup>+</sup>FcεRI<sup>+</sup> cells. FSC and SSC are forward and side scatters, respectively. **(d)** Immunofluorescence of tonsil from a healthy subject stained for IgD (green), tryptase, CD117 or CD123 (red), and FcεRI (blue). DAPI counterstains nuclei. Dashed line demarcates follicles. Arrowheads point to IgD<sup>low</sup>CD117<sup>+</sup>tryptase<sup>+</sup>CD123<sup>-</sup> mast cells (MC), IgD<sup>high</sup>CD117<sup>-</sup>tryptase<sup>+</sup>CD123<sup>+</sup> basophils (Basø), and IgD<sup>high</sup>CD117<sup>-</sup>tryptase<sup>-</sup>CD123<sup>-</sup> plasmablasts (B). Dashed line demarcates follicle. Original magnification, ×10 (uppermost panels) and ×40 (bottom panels). Panels a-d show 1 of 3 experiments yielding similar results.

**Figure S6.** IgD-detecting F(ab')<sub>2</sub> antibody does not cross-react with IgG. **(a)** IgD binding profile of HMC-1 mastocytoid, KU812 pre-basophilic and U937 monocytoid cell lines incubated with a goat F(ab')<sub>2</sub> pAb to IgD in the absence of exogenous monoclonal IgD. **(b)** IgD and IgG binding profiles of HMC-1, KU812 and U937 cell lines incubated with a goat F(ab')<sub>2</sub> pAb to IgD or a goat F(ab')<sub>2</sub> pAb to

IgG upon incubation with exogenously added polyclonal IgG. **(c)** Percentage of IgD-binding KU812 cells upon incubation with IL-3 for 2 days and subsequent exposure to monoclonal IgD. Stainings were performed with either a goat F(ab')<sub>2</sub> pAb to IgD or a mouse IA6-2 mAb to IgD or a mouse IgD26 mAb to IgD. **(d)** Percentage of IgD-binding HMC-1 cells incubated with either polyclonal IgD from normal plasma or monoclonal IgD from a multiple myeloma patient and then stained with a goat F(ab')<sub>2</sub> pAb to IgD. Panels a-d show 1 of 3 experiments yielding similar results.

**Figure S7.** Basophilic and mastocytoid cell lines up-regulate binding of IgD upon undergoing maturation in response to IL-3 or IL-4. **(a)** Flow cytometric analysis of monoclonal IgD binding to basophilic KU812 cells cultured in the presence or absence of IL-3 for 4 days. KU812 cells were stained for IgD with a F(ab')<sub>2</sub> pAb and for surface CD117, CD124 (IL-4R) and FcεRI with appropriate mAbs. Unlike non-malignant basophils, KU812 cells expressed surface CD117. Numbers denote percentage of positive cells. Dead cells were excluded using 7-AAD. **(b)** Binding of monoclonal IgD to LAD2 mast cells cultured in the presence or absence of IL-4 for 4 days. LAD2 cells were also stained for surface CD123. A F(ab')<sub>2</sub> pAb was used to detect IgD. Dead cells were excluded using 7-AAD. Panels a and b show 1 of 3 experiments yielding similar results.

**Figure S8.** IgD<sup>+</sup>IgM<sup>-</sup> plasmablasts and IgD-armed granulocytes in channel catfish. **(a)** Flow cytometric analysis of IgM and IgD on circulating lymphocytes from a representative fish. IgD<sup>+</sup>IgM<sup>-</sup> plasmablasts (red gate) as well as IgD<sup>+</sup>IgM<sup>+</sup> and IgD<sup>-</sup>IgM<sup>+</sup> lymphocytes (blue gate) were studied for morphology by Giemsa and for expression of transcripts encoding membrane (m) and secreted (s) IgM and IgD by RT-PCR. FSC and SSC, forward and side scatter. **(b)** Flow cytometric analysis of IgM (blue histogram) and IgD (red histogram) on circulating mononuclear cells from a different fish. Gates G1 and G2 correspond to canonical lymphocytic and granulocytic cells, respectively. The black histogram is an isotype-matched control. **(c)** Granular IgD<sup>+</sup>IgM<sup>-</sup> cells were sorted from fish leukocytes shown in b to study their

morphology as well as expression of transcripts encoding IgM and IgD. Elongation factor-1a (EF-1 $\alpha$ ) transcript is a loading control. Panels a-c show 1 of 5 experiments yielding similar results.

**Figure S9.** IgD or IgE cross-linking induces distinct patterns of surface CD63, BAFF, APRIL and CD40L expression on basophils. Flow cytometric analysis of CD63, BAFF, APRIL and CD40L on basophils exposed to microbeads alone (control), microbead-bound monoclonal anti-IgD, or microbead-bound monoclonal anti-IgE in the presence or absence of IL-3 for 30 min, 16 h or 48 h. Numbers denote percentage of cells in each quadrant. Dead cells were excluded using 7-AAD staining. Data depict 1 of 3 experiments yielding similar results.

**Figure S10.** Dysregulation of IgD class-switched plasmablasts and IgD-armed basophils in patients with autoinflammatory syndrome and periodic fever. **(a, b)** Flow cytometric analysis of circulating IgD<sup>+</sup>IgM<sup>-</sup> plasmablasts and IgD-armed CD123<sup>+</sup>HLA-DR<sup>-</sup> basophils in healthy individuals and patients with MWS (1 case), HIDS (4 cases), PFAPA (3 cases), and TRAPS (5 cases). The dashed line indicates the average percentage of plasmablasts and basophils within B cells and mononuclear cells, respectively, in healthy individuals. IgD was stained with a F(ab')<sub>2</sub> pAb. Dead cells were excluded using 7-AAD. **(c)** Immunofluorescence analysis of tonsillar tissue from a patient with PFAPA syndrome stained for APRIL or LL-37 (green), CD117 or CD123 (red), and Fc $\epsilon$ RI (blue). DAPI counterstains nuclei (note lobated nuclei of basophils). Arrowheads point to activated APRIL<sup>+</sup>CD117<sup>-</sup>Fc $\epsilon$ RI<sup>+</sup> or LL-37<sup>+</sup>CD123<sup>+</sup>Fc $\epsilon$ RI<sup>+</sup> basophils (Bas $\emptyset$ ) from extrafollicular areas. Original magnification,  $\times$ 40. Panels a-c show 1 of 3 experiments yielding similar results.

**Figure S11.** Model of IgD regulation and function. B cells from the upper respiratory mucosa undergo CSR from C $\mu$  to C $\delta$  through local TD and TI pathways involving CD40L, BAFF or APRIL together with a unique cocktail of cytokines, including IL-2 and IL-21 or IL-15 and IL-21. CSR requires AID and generates mucosal and circulating plasmablasts that secrete IgD antibodies reactive against respiratory

bacteria. Mucosal IgD might enhance local immunity after translocating across epithelial cells, whereas circulating IgD binds to basophils via a calcium-mobilizing receptor. In addition to delivering rapid innate responses and alerting the immune system as to the presence of invading bacteria, basophils exposed to IgD-reactive antigens migrate to systemic and mucosal lymphoid organs, perhaps in response to chemotactic factors released by IgD-stimulated mast cells. Tissue-based basophils enhance immune protection by releasing antimicrobial, opsonizing, B cell-stimulating, chemotactic and pro-inflammatory mediators such as cathelicidin, IL-1, IL-4, IL-8, IL-13, CD40L, BAFF, APRIL, TNF and CXCL10, but not histamine. Finally, IgD-armed basophils may regulate B cell homeostasis through tonic release of the obligatory B cell survival factor BAFF in response to IgD-reactive foreign or autologous antigens.

**SUPPLEMENTARY TABLES****Table S1 Antibodies used in flow cytometry and immunofluorescence****a. Flow cytometry**

| Antigen   [Epitope] |         | Label        | Isotype     | Clone<br>(if monoclonal) | Manufacturer                  | Note                                                                                                  |
|---------------------|---------|--------------|-------------|--------------------------|-------------------------------|-------------------------------------------------------------------------------------------------------|
| AID                 |         | -            | Mouse IgG1  | C12.38                   | German Cancer Research Center |                                                                                                       |
| APRIL               | [AT125] | -            | Rabbit IgG  | -                        | Alexis                        | Specific to membrane-expressed APRIL, not soluble APRIL or soluble APRIL that binds to cell membrane. |
| BAFF (CD257)        |         | PE           | Mouse IgG1  | 1D6                      | eBioscience                   |                                                                                                       |
|                     |         | Biotin       | Mouse IgG1  | 1D6                      | eBioscience                   |                                                                                                       |
| BAFF-R (CD268)      |         | PE           | Mouse IgG1  | 11C1                     | BD Biosciences                |                                                                                                       |
| BCMA                | [N-16]  | -            | Goat IgG    | -                        | Santa Cruz                    |                                                                                                       |
| Blimp-1             |         | -            | Mouse IgG1  | 3H2-E8                   | Novus Biologicals             |                                                                                                       |
| CD3                 |         | FITC         | Mouse IgG1  | UCHT1                    | Ancell                        |                                                                                                       |
|                     |         | Biotin       | Mouse IgG1  | UCHT1                    | BD Biosciences                |                                                                                                       |
| CD4                 |         | FITC         | Mouse IgG2b | M-T441                   | Ancell                        |                                                                                                       |
|                     |         | Biotin       | Mouse IgG1  | SK3                      | BD Biosciences                |                                                                                                       |
| CD5                 |         | PE           | Mouse IgG1  | UCHT2                    | BD Biosciences                |                                                                                                       |
| CD8                 |         | PE           | Mouse IgG2a | UCHT4                    | Sigma                         |                                                                                                       |
| CD10                |         | PE           | Mouse IgG1  | ALB1                     | Immunotech                    |                                                                                                       |
| CD11c               |         | PE           | Mouse IgG1  | B-ly6                    | BD Biosciences                |                                                                                                       |
| CD14                |         | PE           | Mouse IgG2a | UCHM-1                   | Sigma                         |                                                                                                       |
|                     |         | Biotin       | Mouse IgG2a | UCHM-1                   | Southern Biotech              |                                                                                                       |
| CD15                |         | FITC         | Mouse IgM   | 28                       | Southern Biotech              |                                                                                                       |
| CD16                |         | Biotin       | Mouse IgG1  | 3G8                      | BD Biosciences                |                                                                                                       |
| CD19                |         | FITC         | Mouse IgG1  | SJ25-C1                  | Southern Biotech              |                                                                                                       |
|                     |         | PE           | Mouse IgG1  | 4G7                      | BD Biosciences                |                                                                                                       |
|                     |         | APC          | Mouse IgG1  | H1B19                    | BD Biosciences                |                                                                                                       |
|                     |         | Pacific Blue | Mouse IgG1  | H1B19                    | BioLegend                     |                                                                                                       |
|                     |         | Biotin       | Mouse IgG1  | H1B19                    | BD Biosciences                |                                                                                                       |



Supplementary information

|               |        |                              |                |                  |                                                                                                     |
|---------------|--------|------------------------------|----------------|------------------|-----------------------------------------------------------------------------------------------------|
| CD20          | FITC   | Mouse IgG1                   | L27            | BD Biosciences   |                                                                                                     |
| CD21          | PE     | Mouse IgG1                   | B-ly4          | BD Biosciences   |                                                                                                     |
| CD22          | -      | Mouse IgG1                   | FPC1           | Novocastra       |                                                                                                     |
| CD23          | FITC   | Mouse IgG1                   | 9P25           | Immunotech       |                                                                                                     |
| CD24          | PE     | Mouse IgG2a                  | ML5            | BD Biosciences   |                                                                                                     |
| CD27          | FITC   | Mouse IgG1                   | M-T271         | BD Biosciences   |                                                                                                     |
|               | PE     | Mouse IgG1                   | M-T271         | Ancell           |                                                                                                     |
|               | APC    | Mouse IgG1                   | O323           | eBioscience      |                                                                                                     |
| CD38          | PE     | Mouse IgG1                   | HIT2           | BD Biosciences   |                                                                                                     |
| CD39          | -      | Mouse IgG1                   | BU61           | Binding Site     |                                                                                                     |
| CD40          | FITC   | Mouse IgG1                   | BE-1           | Ancell           |                                                                                                     |
| CD56          | FITC   | Mouse IgG2b                  | NCAM16.2       | BD Biosciences   |                                                                                                     |
| CD63          | FITC   | Mouse IgG1                   | AHN16.1/46-4-5 | Ancell           |                                                                                                     |
|               | Biotin | Mouse IgG1                   | AHN16.1/46-4-5 | Ancell           |                                                                                                     |
| CD80          | FITC   | Mouse IgM                    | BB1            | BD Biosciences   |                                                                                                     |
| CD83          | FITC   | Mouse IgG1                   | HB15e          | Ancell           |                                                                                                     |
| CD86          | PE     | Mouse IgG2b                  | IT2.2          | BD Biosciences   |                                                                                                     |
| CD95 (Fas)    | PE     | Mouse IgG1                   | DX2            | BD Biosciences   |                                                                                                     |
| CD117         | PE     | Mouse IgG1                   | 104D2          | BD Biosciences   |                                                                                                     |
| CD123         | PE     | Mouse IgG2a                  | 7G3            | BD Biosciences   |                                                                                                     |
|               | APC    | Mouse IgG1                   | 6H6            | eBioscience      |                                                                                                     |
| CD124         | Biotin | Mouse IgG1                   | hIL4R-M57      | BD Biosciences   |                                                                                                     |
| CD138         | PE     | Mouse IgG1                   | Mi15           | BD Biosciences   |                                                                                                     |
| CD154 (CD40L) | PE     | Mouse IgG1                   | 24-31          | Ancell           |                                                                                                     |
| FcεRIα        | Biotin | Mouse IgG2b                  | AER-37         | eBioscience      |                                                                                                     |
| HLA-DR        | FITC   | Mouse IgG2a                  | L243           | BD Biosciences   |                                                                                                     |
|               | PE     | Mouse IgG2a                  | L243           | BD Biosciences   |                                                                                                     |
| IgA           | FITC   | Goat IgG                     | -              | Sigma Aldrich    |                                                                                                     |
|               | PE     | Goat IgG F(ab') <sub>2</sub> | -              | Southern Biotech |                                                                                                     |
|               | Biotin | Goat IgG F(ab') <sub>2</sub> | -              | Southern Biotech |                                                                                                     |
| IgD           | FITC   | Goat IgG F(ab') <sub>2</sub> | -              | Southern Biotech | Used to detect IgD levels on different primary cells and cell lines. Does not cross-react with IgG. |
|               | FITC   | Mouse IgG2a                  | IA6-2          | BD Biosciences   | Tested to yield similar IgD profile as the                                                          |
|               | Biotin | Mouse IgG2a                  | IADB6          | Southern Biotech |                                                                                                     |

Supplementary information

|             |        |                              |          |                  |                                                                   |
|-------------|--------|------------------------------|----------|------------------|-------------------------------------------------------------------|
|             | PE     | Mouse IgG1                   | IgD26    | Santa Cruz       | above FITC-conjugated goat F(ab') <sub>2</sub> anti-IgD antibody. |
| IgE         | FITC   | Goat IgG                     | -        | CAPPEL           |                                                                   |
|             | Biotin | Goat IgG F(ab') <sub>2</sub> | -        | Southern Biotech |                                                                   |
|             | Biotin | Mouse IgG2a                  | G7-26    | BD Pharmingen    |                                                                   |
| IgM         | FITC   | Goat IgG F(ab') <sub>2</sub> | -        | Biosource        |                                                                   |
|             | PE     | Mouse IgG1                   | SA-DA4   | Southern Biotech |                                                                   |
| Igκ         | PE     | Mouse IgG1                   | G20-193  | BD Pharmingen    |                                                                   |
| Igλ         | PE     | Mouse IgG1                   | 1-155-2  | BD Pharmingen    |                                                                   |
| Ki67        | -      | Mouse IgG1                   | MIB-1    | DAKO             |                                                                   |
| MHC-I       | PE     | Mouse IgG2a                  | 3F10     | Ancell           |                                                                   |
| MHC-II      | PE     | Mouse IgG1                   | TDR31.3  | Ancell           |                                                                   |
| Pax5 (BSAP) | -      | Mouse IgG2a                  | A-11     | Santa Cruz       |                                                                   |
| RAG2        | [C-19] | -                            | Goat IgG | -                | Santa Cruz                                                        |
| TACI        | PE     | Mouse IgG1                   | 165604   | R&D Systems      |                                                                   |
| Tryptase    | -      | Mouse IgG1                   | AA1      | DAKO             |                                                                   |

**b. Immunofluorescence**

| Antigen   [Epitope] | Label  | Isotype    | Clone (if monoclonal) | Manufacturer      | Note           |
|---------------------|--------|------------|-----------------------|-------------------|----------------|
| AID                 |        | -          | Rat IgG2b             | EK2 5G9           | Cell Signaling |
|                     | [C-20] | -          | Goat IgG              | -                 | Santa Cruz     |
| APRIL               | [N16]  | -          | Goat IgG              | -                 | Santa Cruz     |
|                     | ED2    | -          | Rabbit IgG            | -                 | Prosci         |
| BAFF (CD257)        | PE     | Mouse IgG1 | 1D6                   | eBioscience       |                |
|                     | Biotin | Mouse IgG1 | 1D6                   | eBioscience       |                |
|                     | -      | Rabbit IgG | -                     | Upstate           |                |
| BAFF-R (CD268)      | -      | Mouse IgG1 | 11C1                  | Abcam             |                |
| BCMA                | [N-16] | -          | Goat IgG              | -                 | Santa Cruz     |
| Blimp-1             | -      | Mouse IgG1 | 3H2-E8                | Novus Biologicals |                |
| CD5                 | PE     | Mouse IgG1 | UCHT2                 | BD Biosciences    |                |
| CD10                | PE     | Mouse IgG1 | ALB1                  | Immunotech        |                |

Supplementary information

|             |        |                              |          |                  |                                                                                    |
|-------------|--------|------------------------------|----------|------------------|------------------------------------------------------------------------------------|
| CD19        | PE     | Mouse IgG1                   | 4G7      | BD Biosciences   | These two clones both show that tonsillar IgD plasmablasts are CD19 <sup>+</sup> . |
|             | Biotin | Mouse IgG1                   | H1B19    | BD Biosciences   |                                                                                    |
| CD27        | PE     | Mouse IgG1                   | M-T271   | Ancell           |                                                                                    |
| CD117       | PE     | Mouse IgG1                   | 104D2    | BD Biosciences   |                                                                                    |
|             | -      | Rabbit IgG                   | -        | DAKO             |                                                                                    |
| CD123       | PE     | Mouse IgG2a                  | 7G3      | BD Biosciences   |                                                                                    |
| CD138       | PE     | Mouse IgG1                   | Mi15     | BD Biosciences   |                                                                                    |
| FcεRIα      | Biotin | Mouse IgG2b                  | AER-37   | eBioscience      |                                                                                    |
| Ig          | -      | Goat F(ab') <sub>2</sub>     | -        | Cappel           |                                                                                    |
| IgD         | FITC   | Goat IgG F(ab') <sub>2</sub> | -        | Southern Biotech |                                                                                    |
|             | Biotin | Goat IgG F(ab') <sub>2</sub> | -        | Southern Biotech |                                                                                    |
| IgM         | FITC   | Goat IgG F(ab') <sub>2</sub> | -        | Biosource        |                                                                                    |
|             | PE     | Mouse IgG1                   | SA-DA4   | Southern Biotech |                                                                                    |
|             | Biotin | Goat IgG F(ab') <sub>2</sub> | -        | Southern Biotech |                                                                                    |
|             | -      | Goat IgG F(ab') <sub>2</sub> | -        | Caltag           |                                                                                    |
| Igκ         | PE     | Mouse IgG1                   | G20-193  | BD Pharmingen    |                                                                                    |
|             | -      | Goat IgG F(ab') <sub>2</sub> |          | Caltag           |                                                                                    |
| Igλ         | PE     | Mouse IgG1                   | 1-155-2  | BD Pharmingen    |                                                                                    |
|             | -      | Goat IgG F(ab') <sub>2</sub> |          | Caltag           |                                                                                    |
| Ki67        | -      | Mouse IgG1                   | MIB-1    | DAKO             |                                                                                    |
| LL-37       | -      | Rabbit IgG                   | -        | PANATecs GmbH    |                                                                                    |
| Pax5 (BSAP) | -      | Mouse IgG2a                  | A-11     | Santa Cruz       |                                                                                    |
| RAG2        | [C-19] | -                            | Goat IgG | -                | Santa Cruz                                                                         |
| TACI        | [C-20] | -                            | Goat IgG | -                | Santa Cruz                                                                         |
| Tryptase    | -      | Mouse IgG1                   | AA1      | DAKO             |                                                                                    |

**Table S2 Primers used in regular and quantitative real-time PCR**

| <b>Target Gene</b> |    | <b>Primer sequence</b>        | <b>T<sub>m</sub> Used (°C)</b> |
|--------------------|----|-------------------------------|--------------------------------|
| <i>ACTB</i>        | S  | GGATGCAGAAGGAGATCACT          | 58                             |
|                    | AS | CGATCCACACGGAGTACTTG          |                                |
| <i>CAMP</i>        | S  | GTCACCAGAGGATTGTGACTTCAA      | 58                             |
|                    | AS | TTGAGGGTCACTGTCCCCATA         |                                |
| <i>CRP</i>         | S  | ATACACTGTGGGGCAGAAG           | 58                             |
|                    | AS | CCGCCAAGATAGATGGTGTT          |                                |
| <i>DEFB103A</i>    | S  | TATCTTCTGTTTGCTTTGCTCTTC      | 58                             |
|                    | AS | CCTCTGACTCTGCAATAATATTTCTGTAA |                                |
| <i>PTX3</i>        | S  | GGGACAAGCTCTTCATCATGCT        | 58                             |
|                    | AS | GTCGTCCGTGGCTTGCA             |                                |
| <i>SPAG11A/F</i>   | S  | CTGTTTCCAGGATCGTCTCA          | 58                             |
|                    | AS | GAGATGTGCACTTGGTAAGG          |                                |
| <i>SPAG11D/G</i>   | S  | CTGTTTCCAGGATCGTCTCA          | 58                             |
|                    | AS | GGAACATCCCCTTGGTAAGG          |                                |

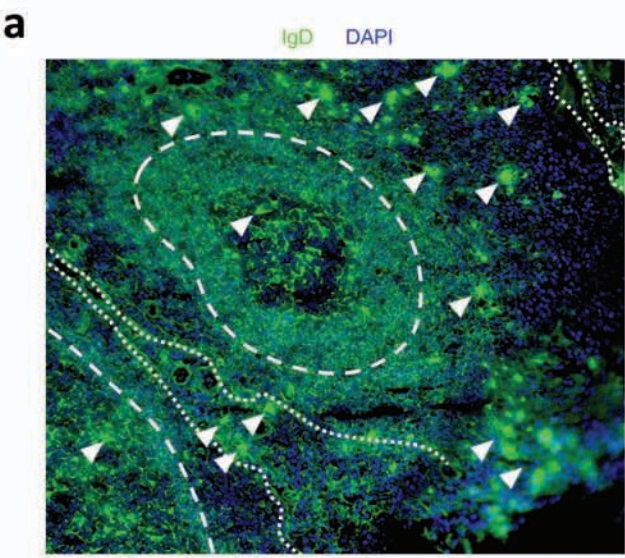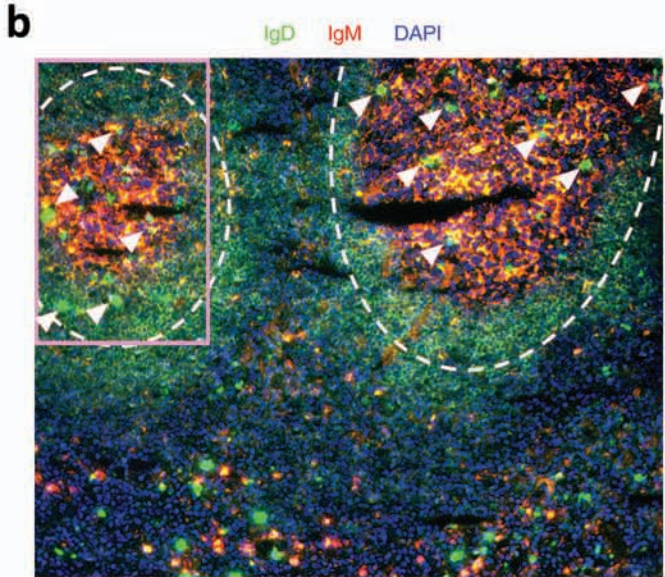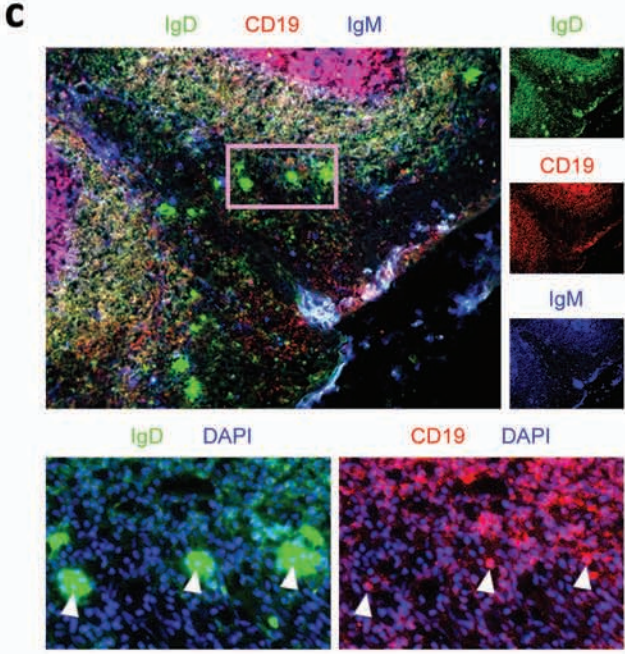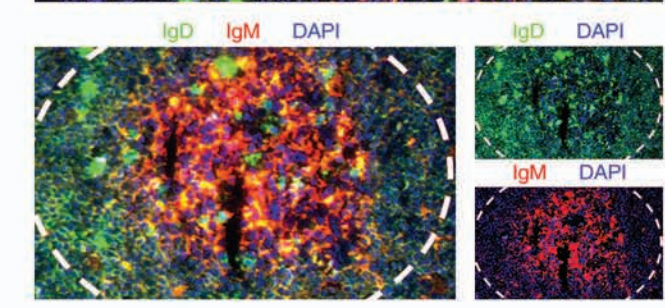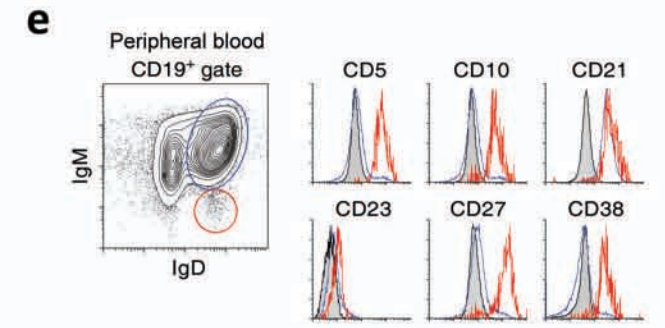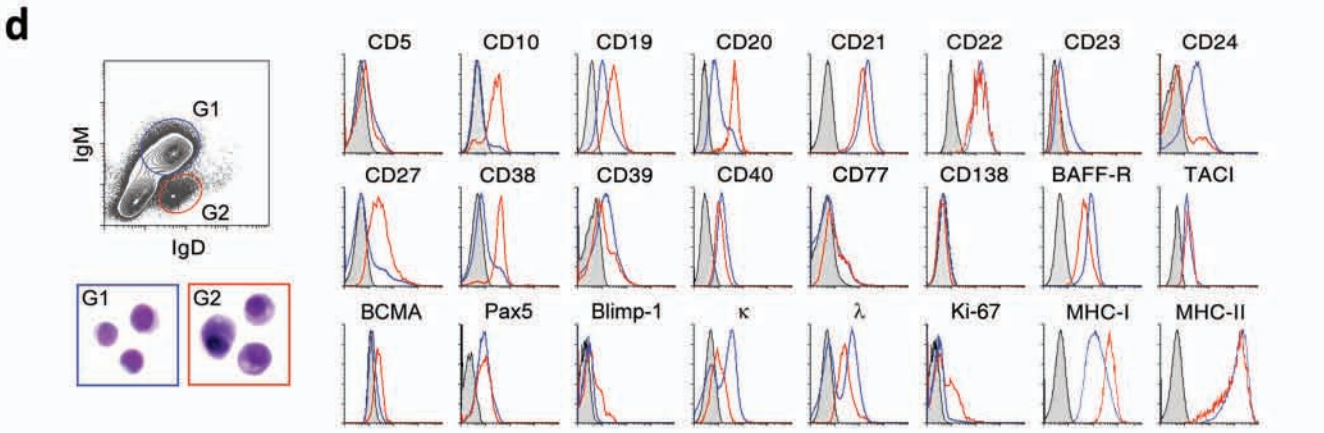

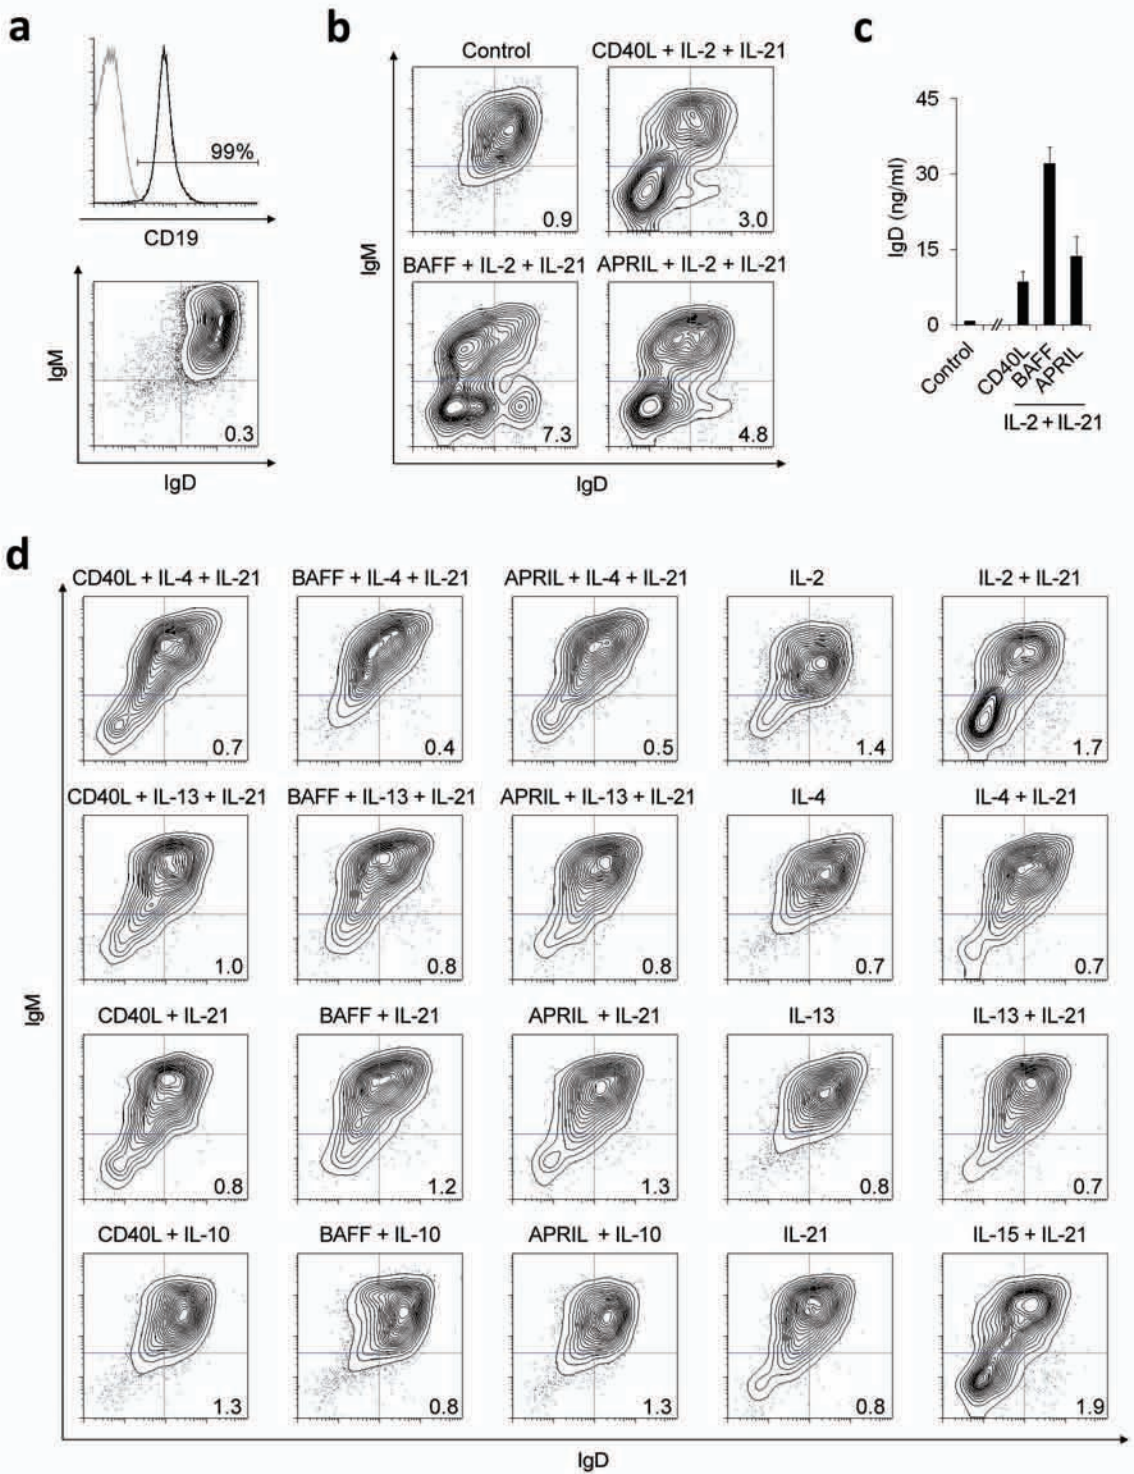

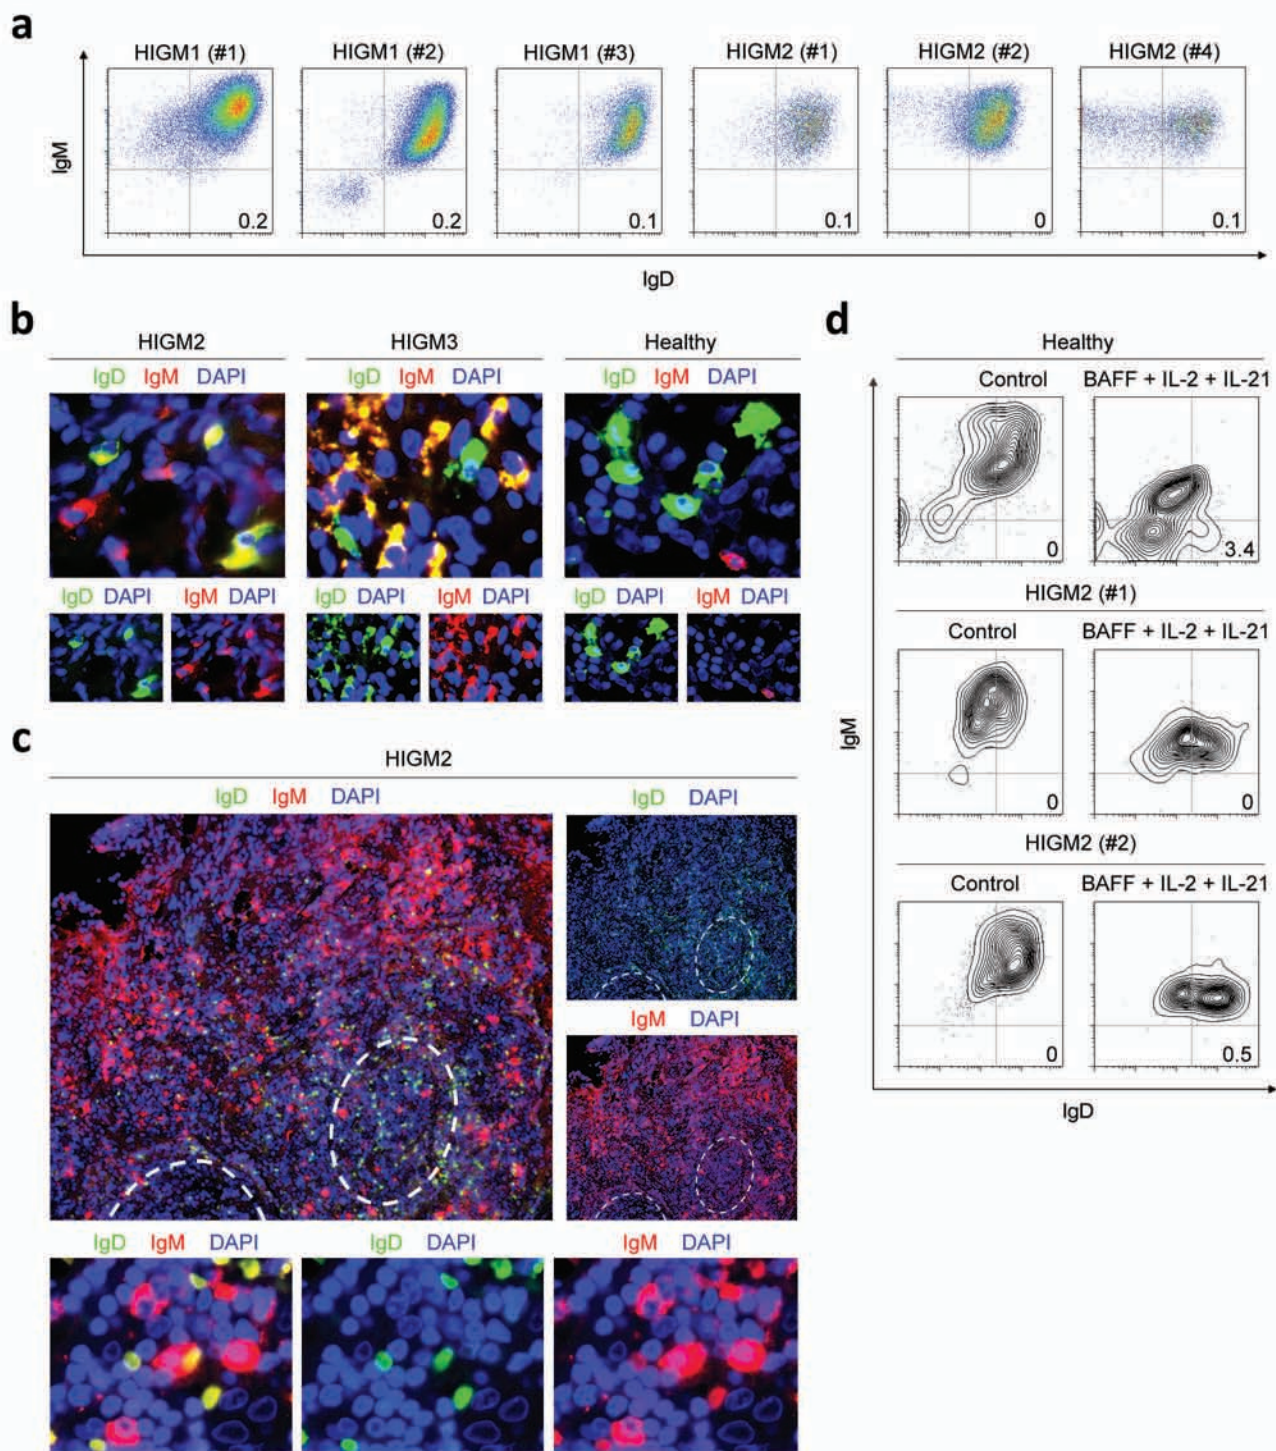

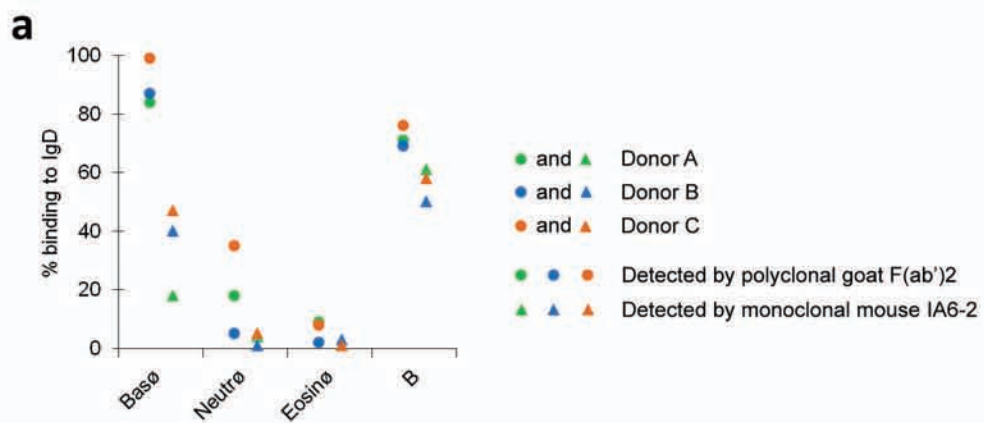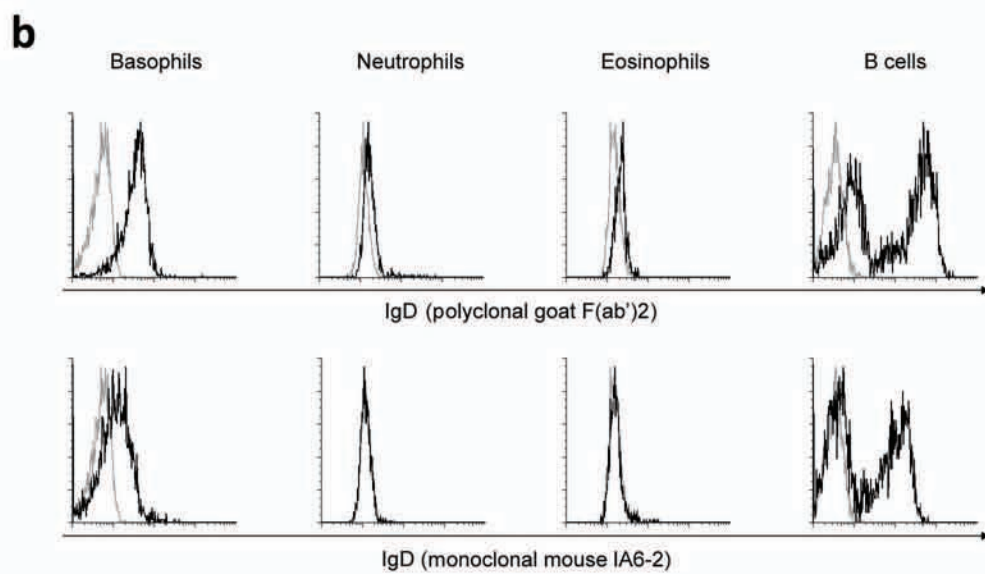



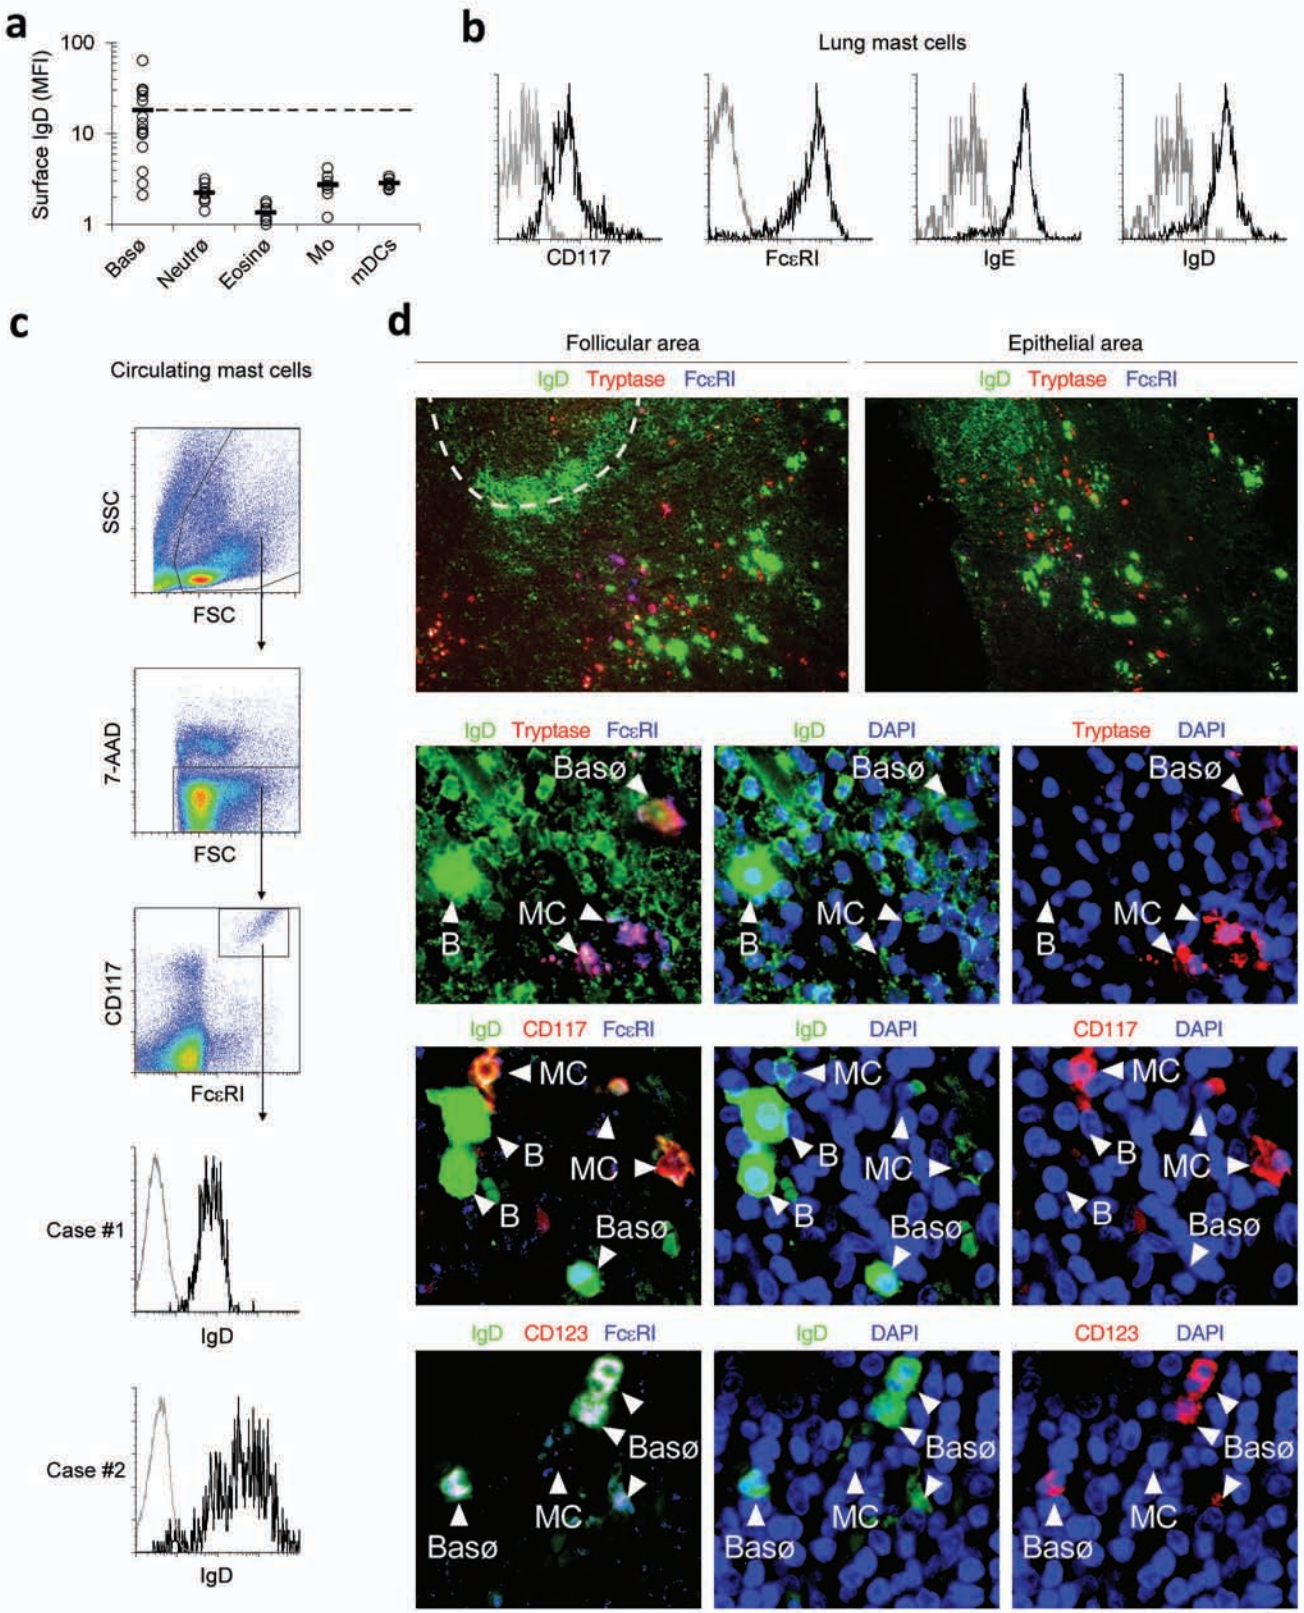

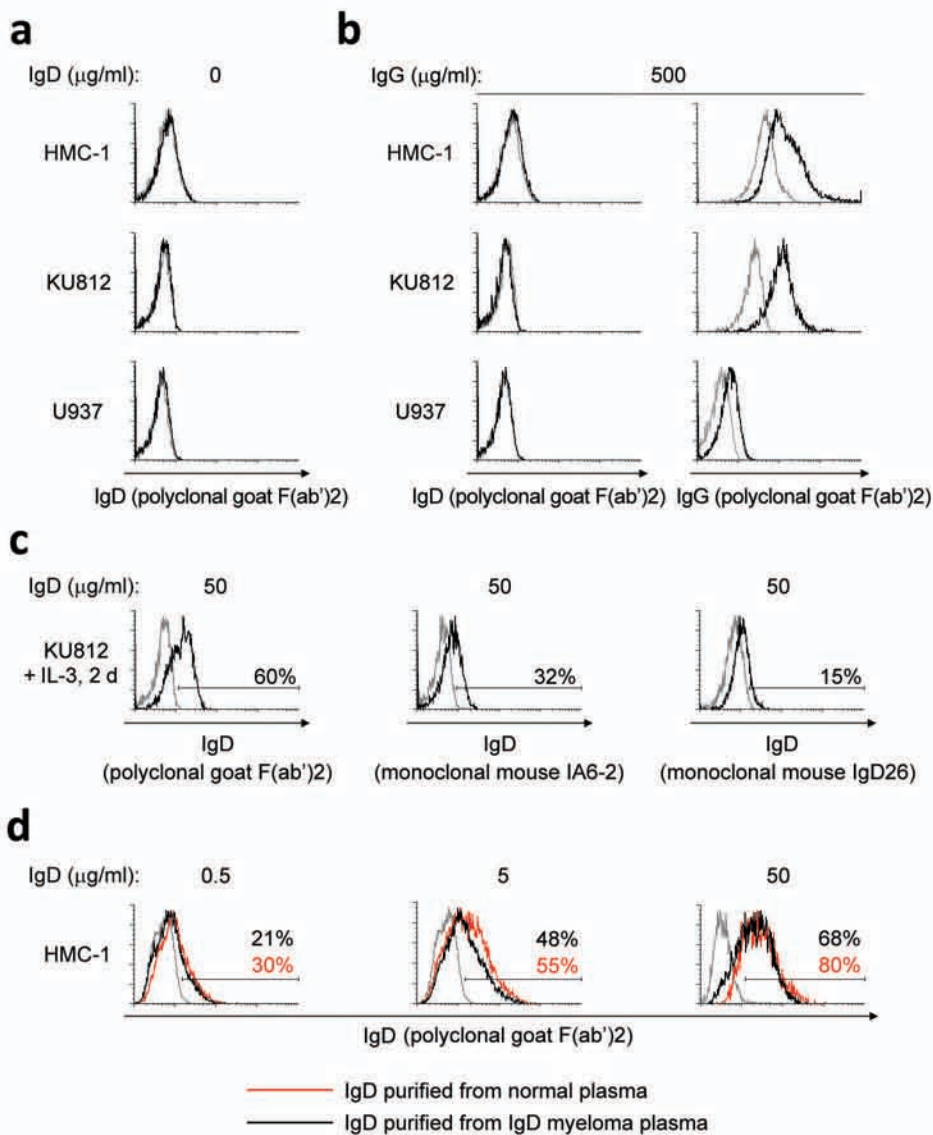

**a**

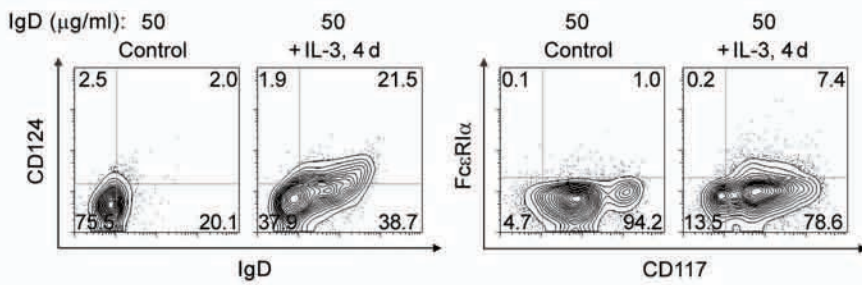

**b**

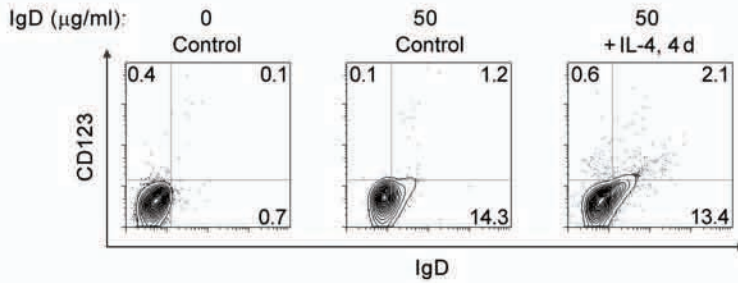

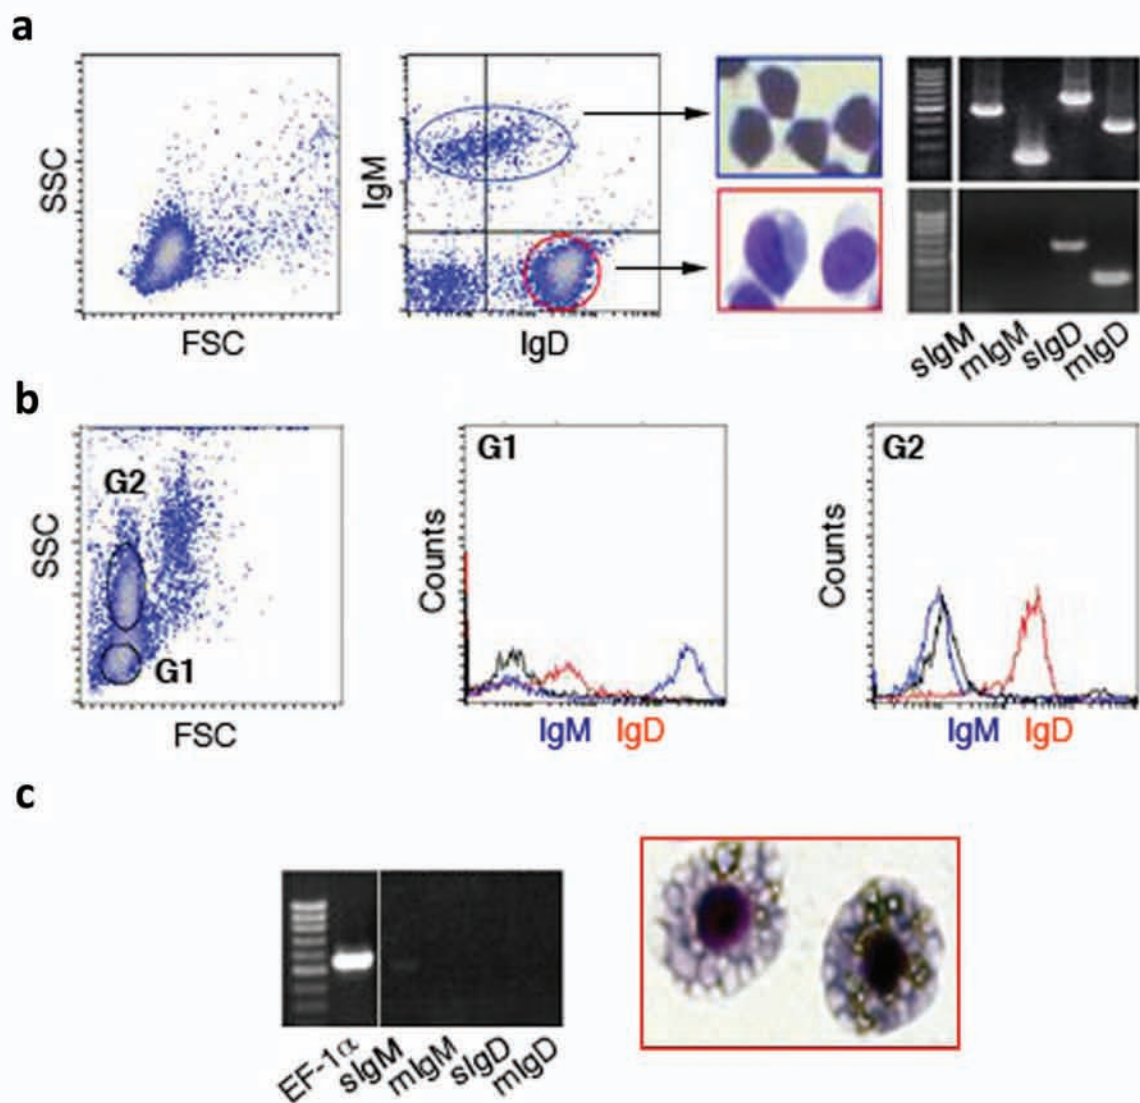

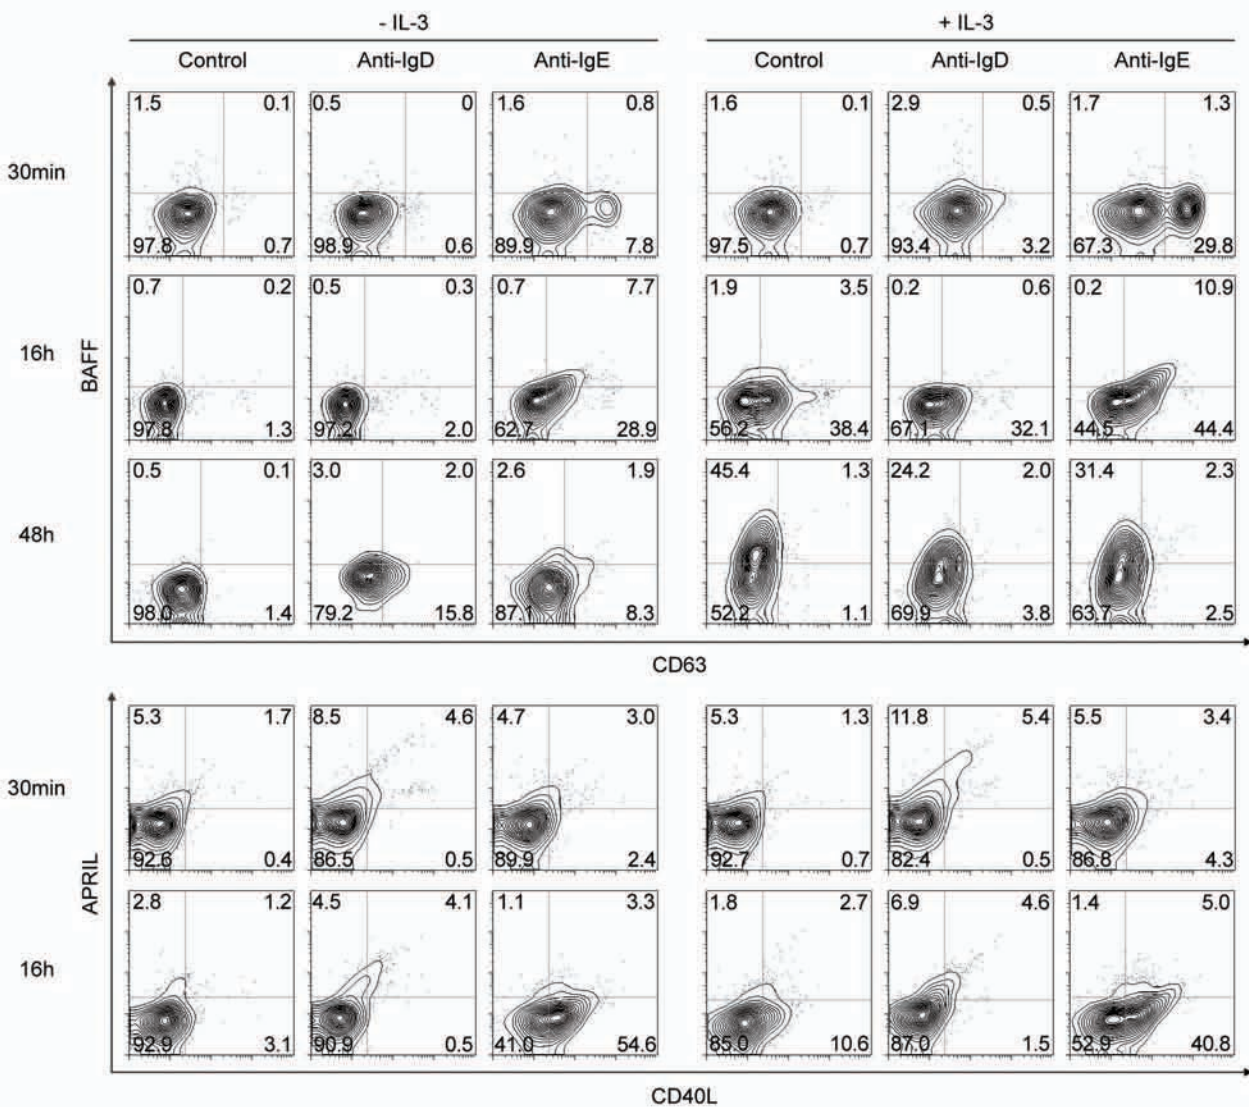

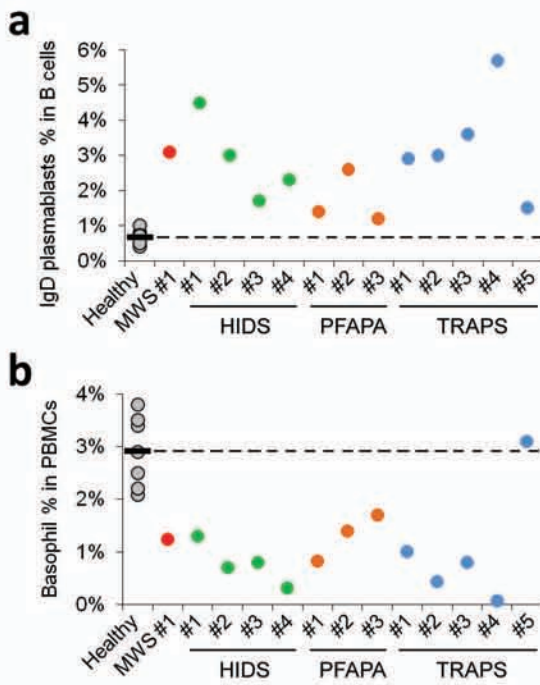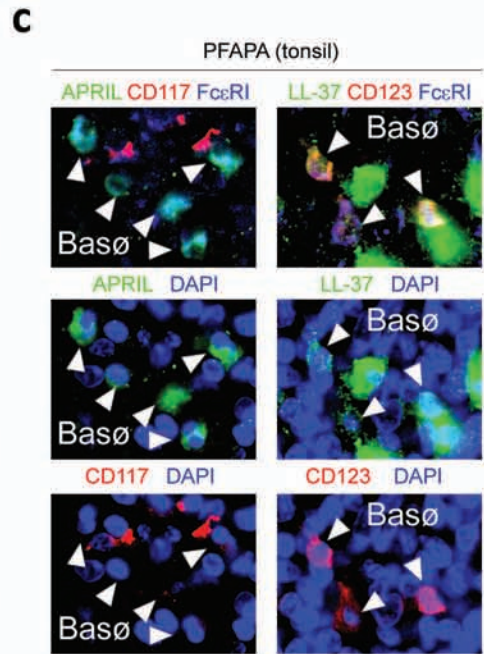

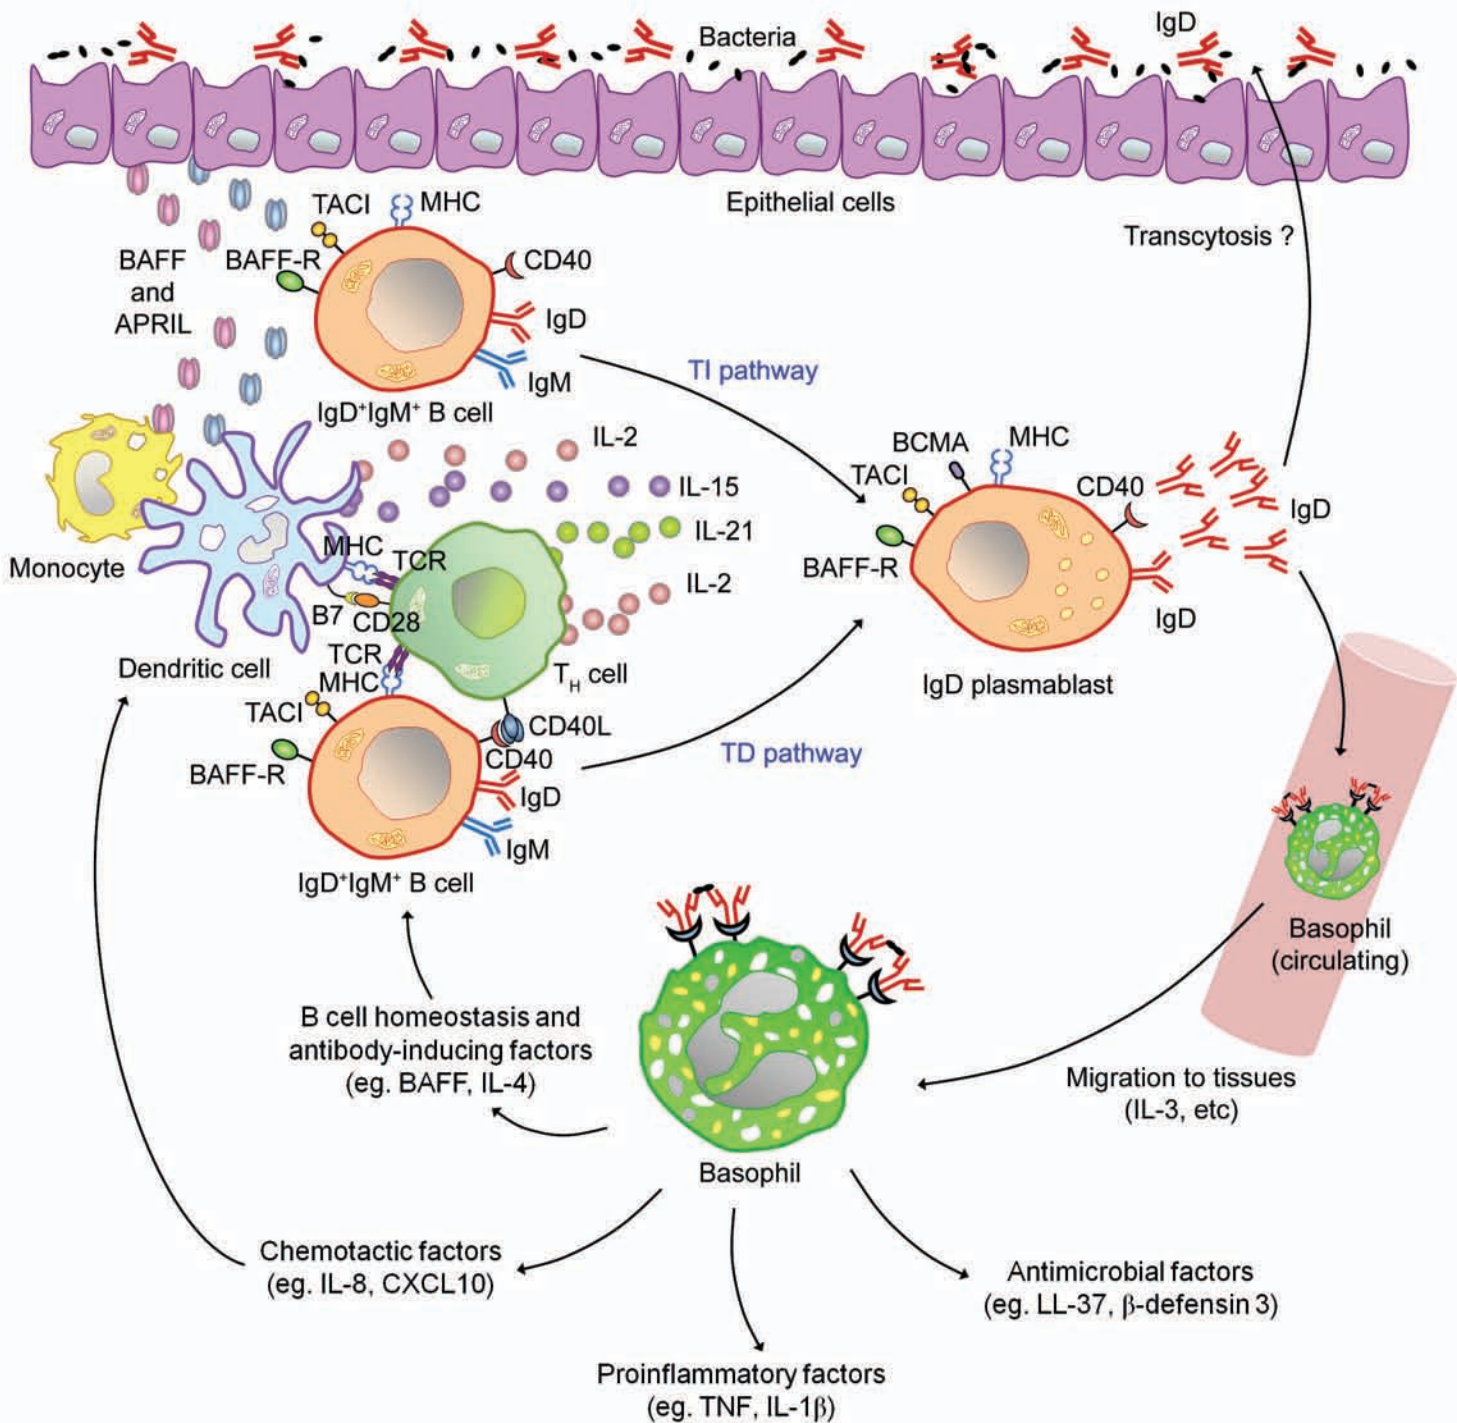

Supplement: 41590_2009_BFni1748_MOESM2_ESM.pdf [file 41590_2009_BFni1748_MOESM2_ESM.pdf]
